# Supplementary material for: The composition of Tibetan kefir grain TKG-Y and the antibacterial potential and milk fermentation ability of S. warneri KYS-164 screened from TKG-Y
Source: Royal Society of Chemistry journal article supplement (doi:10.1039/d4fo00112e), 2024-01-01
Supplement: d4fo00112e2.pdf [file d4fo00112e2.pdf]

A

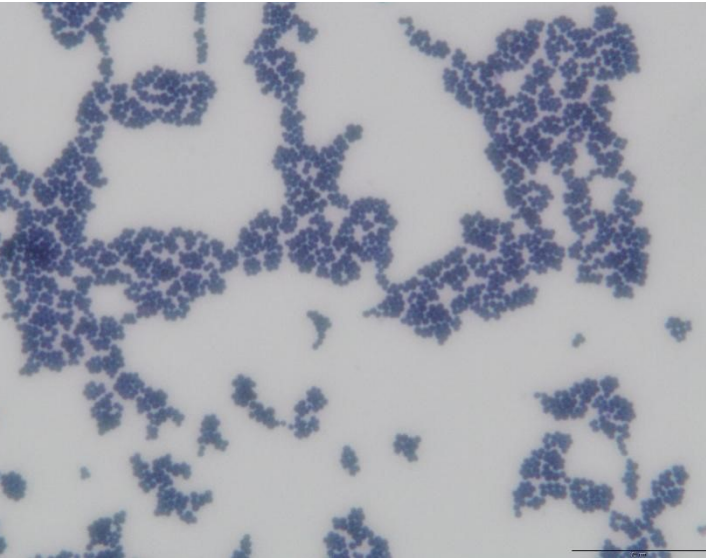

B

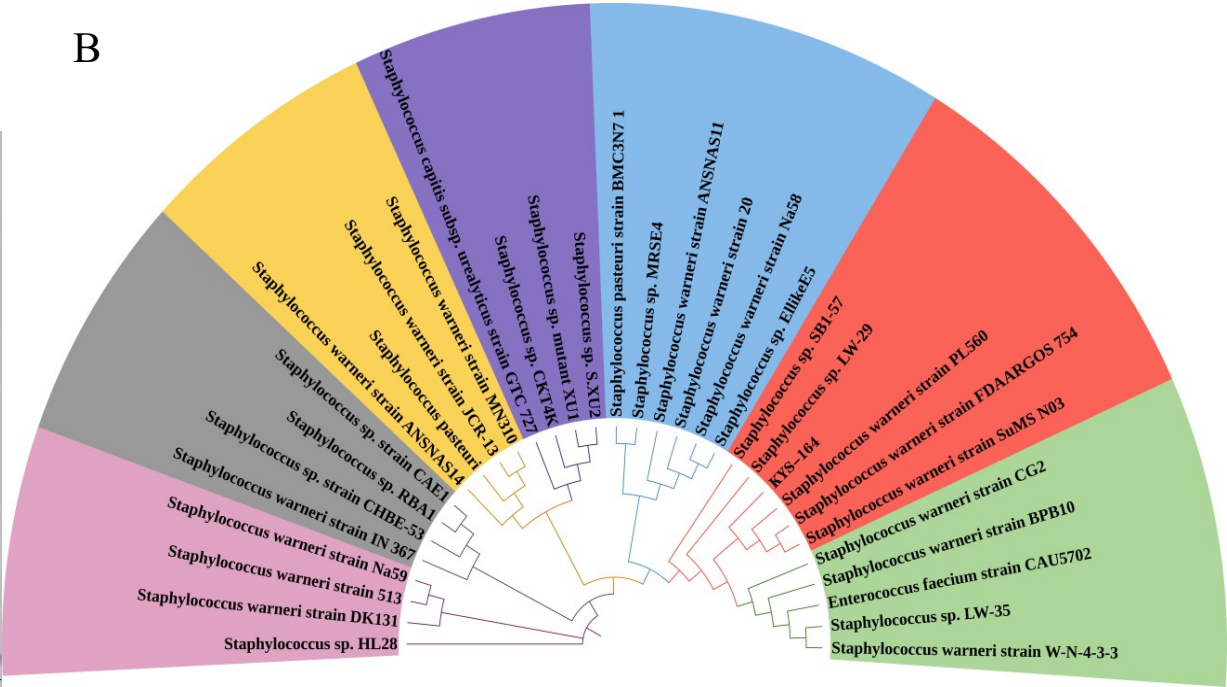

Supplementary figure 1. Gram staining results (A) and neighbor-joining (NJ) phylogenetic tree (B) of KYS-164.
