# Supplementary material for: The composition of Tibetan kefir grain TKG-Y and the antibacterial potential and milk fermentation ability of S. warneri KYS-164 screened from TKG-Y
Source: Royal Society of Chemistry journal article supplement (doi:10.1039/d4fo00112e), 2024-01-01
Supplement: d4fo00112e4.pdf [file d4fo00112e4.pdf]

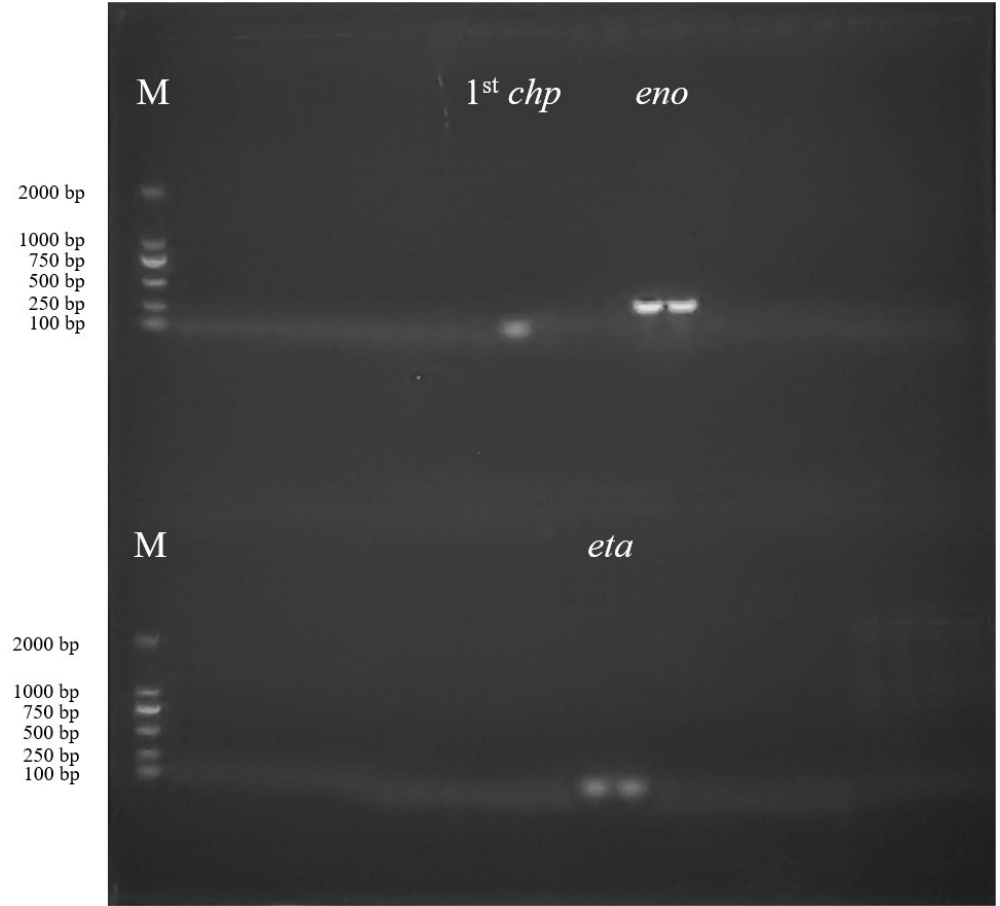

**Supplementary figure 6. Electropherogram of KYS-164 virulence factor amplification results.** The upper row represents *fnb* A, *clf* A, *cna*, *sdr* C, *bbp*, *chp*, *sea*, *eno*, *pvl*, *luk* E, *hla*, and *agr* subgroup I of the first and 80th generations from left to right, respectively. The lower row from left to right represents *mec* A, *ebp* S, *map*, *ica* A, *spl* B, *ssp*, *eta*, *coa*, *nuc*, *scn*, *sak*, and TSST-1 of the first generation and the 80th generation, respectively.
