# Supplementary material for: The composition of Tibetan kefir grain TKG-Y and the antibacterial potential and milk fermentation ability of S. warneri KYS-164 screened from TKG-Y
Source: Royal Society of Chemistry journal article supplement (doi:10.1039/d4fo00112e), 2024-01-01
Supplement: d4fo00112e6.pdf [file d4fo00112e6.pdf]

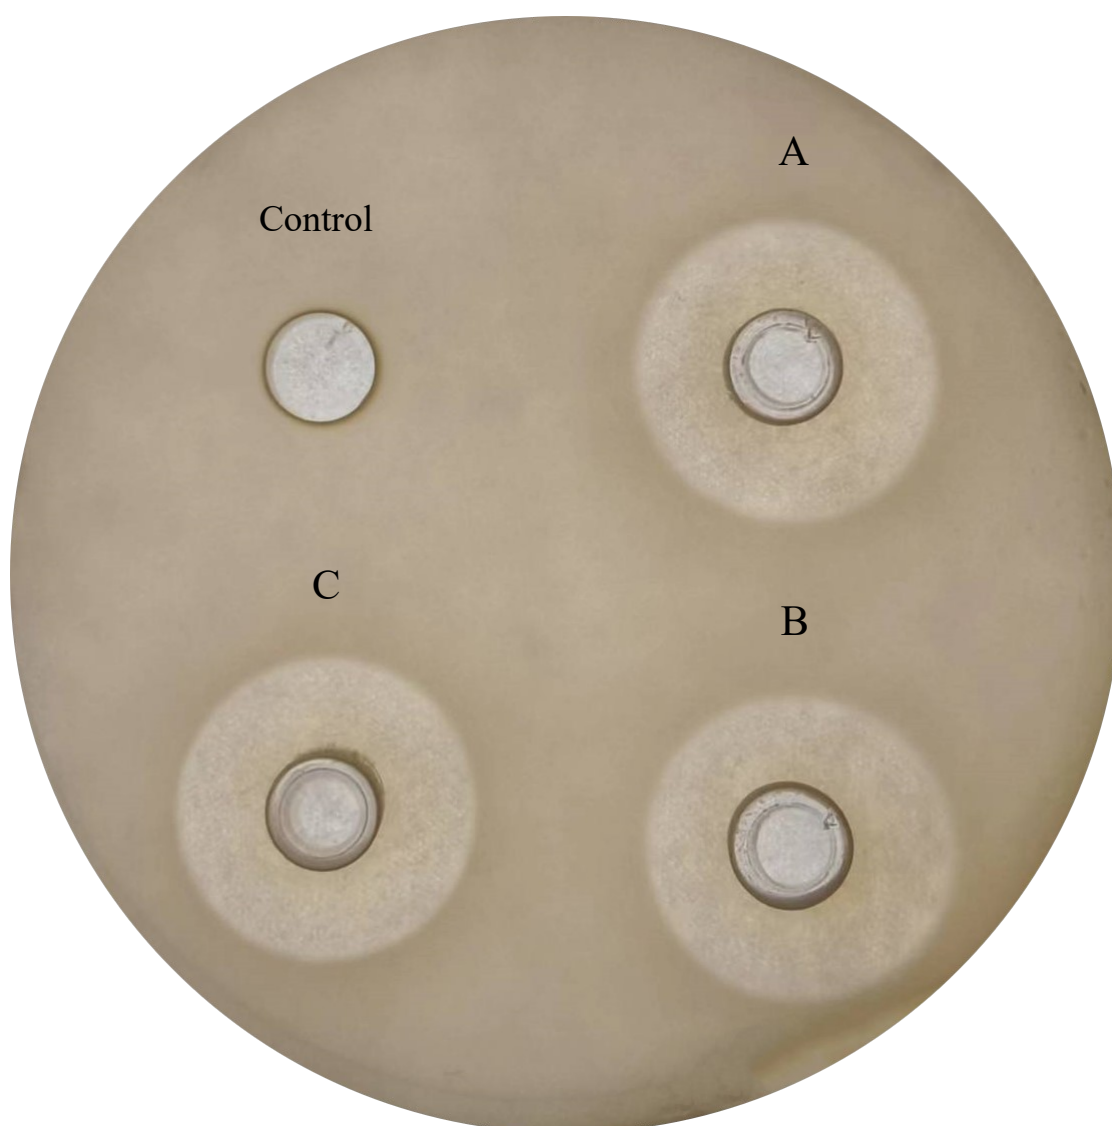

**Supplementary figure 2. Antibacterial activity of BLIS produced by KYS-164.**

A, B, and C respectively represent the antibacterial ability of *S. warneri* KYS-164 extracellular crude protein, BLIS adjusted to pH 6.0, and BLIS after adding catalase to eliminate the effect of hydrogen peroxide. The size of the inhibition zone represents the strength of the antibacterial ability.

Control is a sterile MRS liquid medium.
