# Supplementary material for: The composition of Tibetan kefir grain TKG-Y and the antibacterial potential and milk fermentation ability of S. warneri KYS-164 screened from TKG-Y
Source: Royal Society of Chemistry journal article supplement (doi:10.1039/d4fo00112e), 2024-01-01
Supplement: d4fo00112e7.pdf [file d4fo00112e7.pdf]

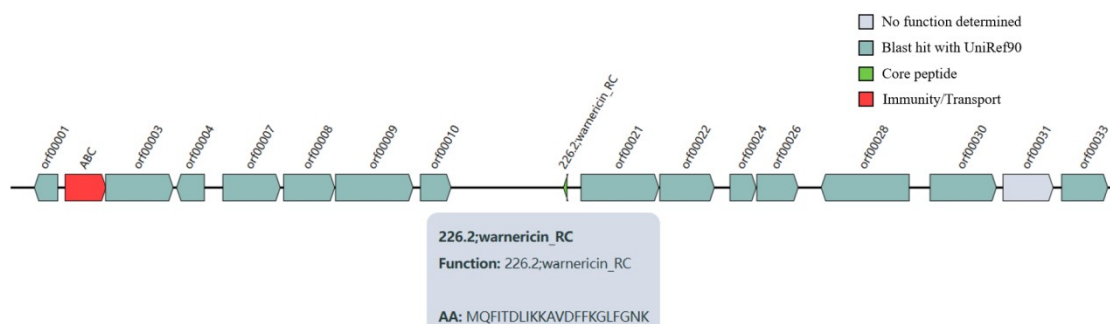

### Supplementary figure 3. Overview of potential antimicrobial protein biosynthesis gene clusters in KYS-164.

The green part represents the matched core gene, warnericin\_RC, which can exert an antibacterial effect. The red part is the matched ABC transporter. The gray parts are protein sequences that have not been matched to function.
