# Supplementary material for: The composition of Tibetan kefir grain TKG-Y and the antibacterial potential and milk fermentation ability of S. warneri KYS-164 screened from TKG-Y
Source: Royal Society of Chemistry journal article supplement (doi:10.1039/d4fo00112e), 2024-01-01
Supplement: d4fo00112e8.pdf [file d4fo00112e8.pdf]

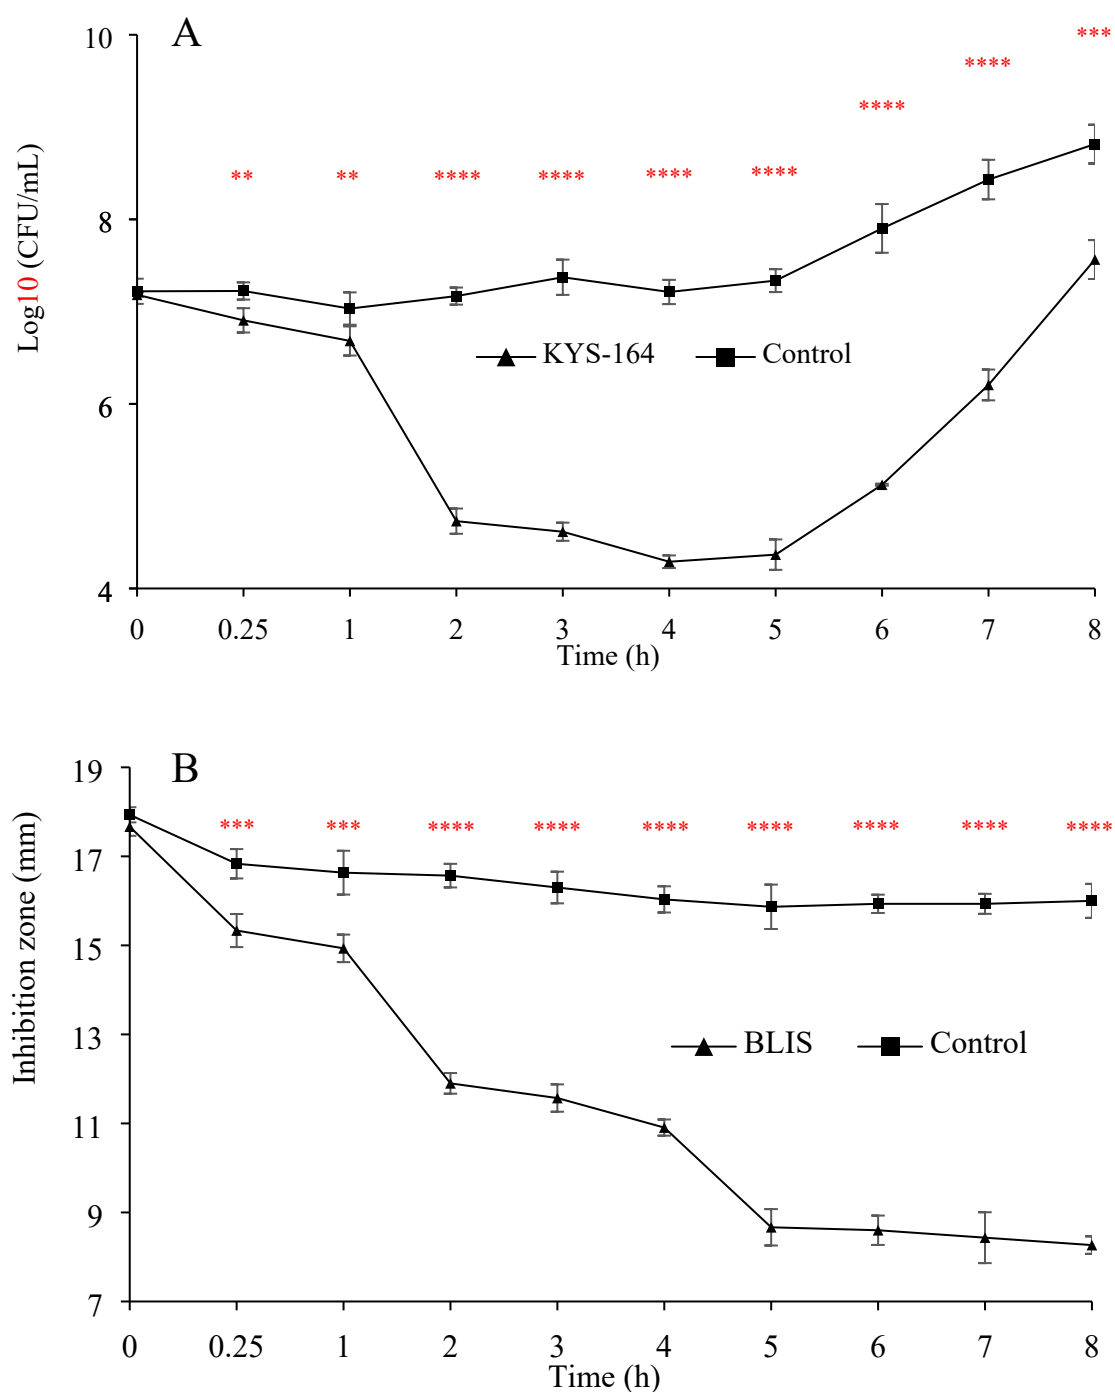

**Supplementary figure 4. Activity changes of KYS-164 and BLIS in simulated environment of oral cavity and gastrointestinal tract.**

A is the total number of colonies of KYS-164 in the simulated stage of oral and gastrointestinal digestion. B is the change in the antibacterial activity of BLIS during the digestion simulation stage (shown by the diameter of the inhibition zone). Among them, 0-0.25 h is oral digestion simulation. 1-5 h for gastric digestion simulation. And 5-8 h for intestinal digestion simulation. 1×PBS without

salivary alpha-amylase, pepsin, trypsin and bile salts was used as the negative control. Use two-way repeated measures ANOVA to analyze the significant differences in the number of colonies or the diameter of the inhibitory zone between the experimental group and the control group at different time points. \*\* means  $p < 0.01$ , \*\*\* means  $p < 0.001$ , \*\*\*\* means  $p < 0.0001$ .
